# Supplementary material for: A novel near-infrared fluorescent probe based on triphenylamine derivatives for the rapid and sensitive detection of heparin
Source: Royal Society of Chemistry journal article supplement (doi:10.1039/d2an00254j), 2022-01-01
Supplement: d2an00254j1.pdf [file d2an00254j1.pdf]

## Supporting information

### **A novel near-infrared fluorescent probe based on triphenylamine derivatives for rapid and sensitive detection of heparin**

Mingming Liu, Jian Cao \*, Cuiping Huang, Meijuan Zhang, Yanan Li, Chuanxiao

Wang

School of Chemistry and Chemical Engineering, Shanghai University of Engineering

Science, 333 Longteng Road, Shanghai, 201600, P. R. China Fax: 86-21-67791214

E-mail: [caoj@sues.edu.cn](mailto:caoj@sues.edu.cn)

## Contents

|                                                                                                     |   |
|-----------------------------------------------------------------------------------------------------|---|
| 1. The photophysical properties of <b>TPA-P<sup>+</sup></b> .....                                   | 1 |
| 2. DFT optimized structure of <b>TPA-P<sup>+</sup></b> .....                                        | 3 |
| 3. The response of compound 3 to heparin .....                                                      | 3 |
| 4. Stability of free <b>TPA-P<sup>+</sup></b> and <b>TPA-P<sup>+</sup></b> +heparin complex .....   | 3 |
| 5. The selectivity of <b>TPA-P<sup>+</sup></b> +heparin complex to PRTM.....                        | 4 |
| 6. Reversibility of the “off-on-off” system constructed by <b>TPA-P<sup>+</sup></b> +heparin+PRTM . | 5 |
| 7. Heparin sensing in serum containing 100 mM NaCl.....                                             | 5 |
| 8. HRMS and NMR characterizations .....                                                             | 5 |

## 1. The photophysical properties of TPA-P<sup>+</sup>

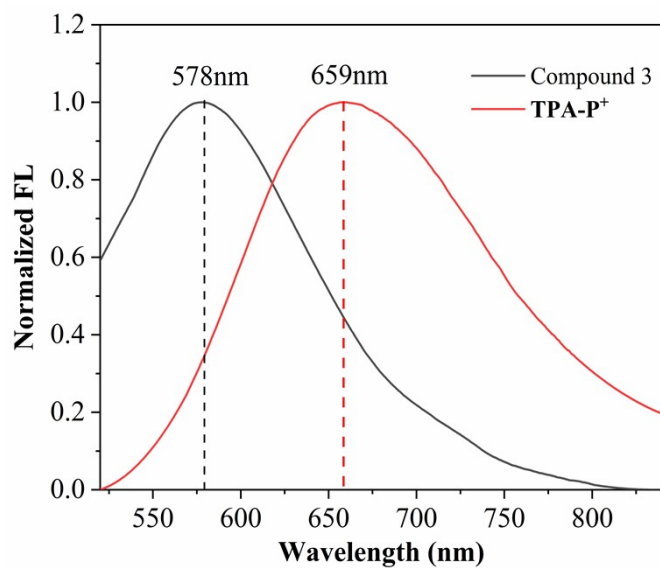

Figure S1. The fluorescence emission spectra of TPA-P<sup>+</sup> and compound 3 in the water (containing 1% DMSO).

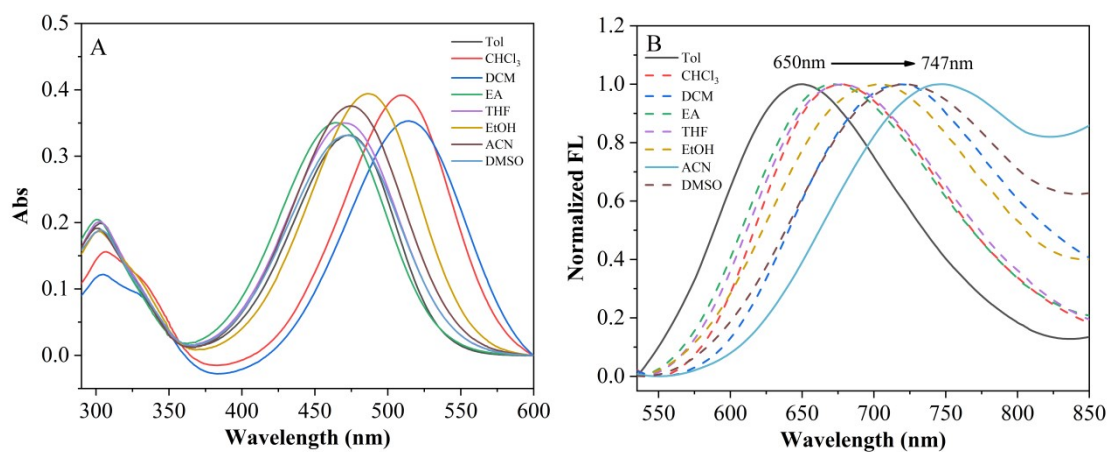

Figure S2. (A) Changes in absorption spectra and (B) Normalized fluorescence emission spectra of TPA-P<sup>+</sup> (10  $\mu$ M) in different solvents.

Table S1. Parameters of the solvents

| solvent         | $\Delta f$ | $\lambda_{\text{abs}}$ | $\lambda_{\text{em}}$ | Stokes shift<br>( $\text{cm}^{-1}$ ) |
|-----------------|------------|------------------------|-----------------------|--------------------------------------|
| Toluene         | 0.014      | 472                    | 650                   | 5802                                 |
| $\text{CHCl}_3$ | 0.148      | 509                    | 677                   | 4875                                 |
| DCM             | 0.217      | 514                    | 720                   | 5566                                 |
| EA              | 0.221      | 464                    | 672                   | 6670                                 |
| THF             | 0.21       | 471                    | 677                   | 6460                                 |
| DMSO            | 0.263      | 472                    | 721                   | 7317                                 |
| MeCN            | 0.305      | 474                    | 745                   | 7674                                 |
| EtOH            | 0.29       | 486                    | 706                   | 6412                                 |

$\Delta f$  was chosen as the measure of polarity.  $\epsilon$  was the static dielectric constant and  $n$  was the optical refractive index of the solvent.

(1)

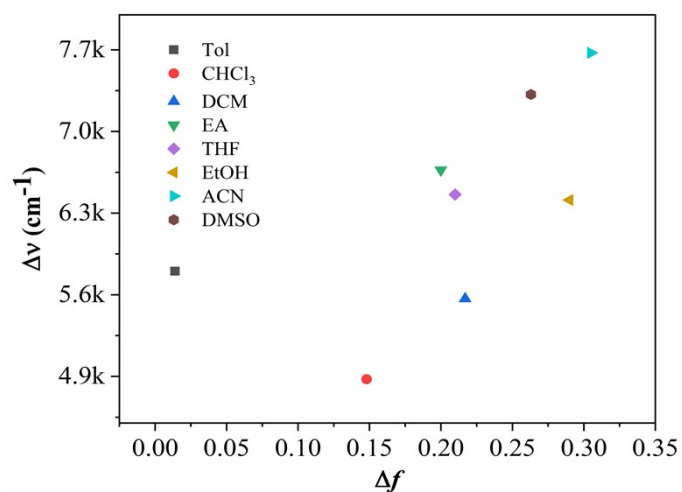

Figure S3. The Lippert-Mataga plot of Stokes shift ( $\Delta\nu$ ) of **TPA-P<sup>+</sup>** versus  $\Delta f$  in different solvents.

## 2. DFT optimized structure of **TPA-P<sup>+</sup>**

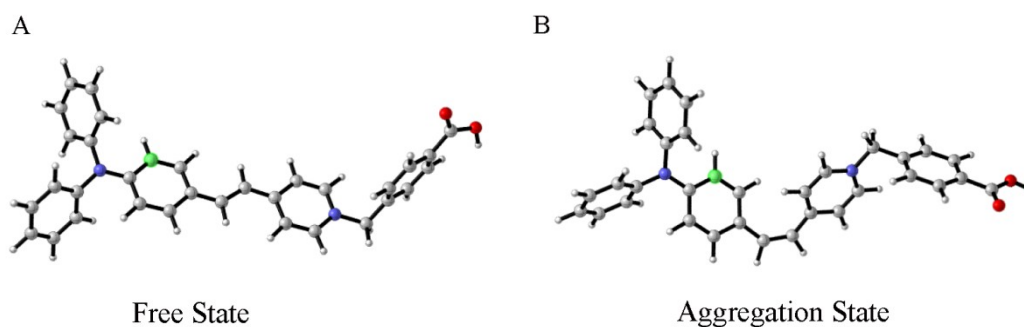

Figure S4. Density functional theory (DFT) optimized structure of **TPA-P<sup>+</sup>**. In the ball-and-stick representation, hydrogen, carbon, nitrogen and oxygen are colored in white, gray, blue and green, red, respectively. The calculations are based on the optimized ground state geometry ( $S_0$  state) at the B3LYP/6-31g\*/ level using Gaussian 09W.

## 3. The response of compound 3 to heparin

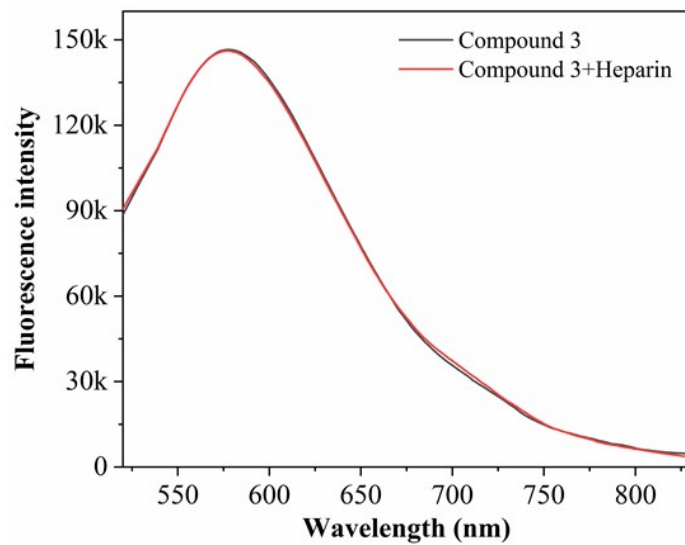

Figure S5. The response of compound 3 to heparin.

#### 4. Stability of free $\text{TPA-P}^+$ and $\text{TPA-P}^+$ +heparin complex

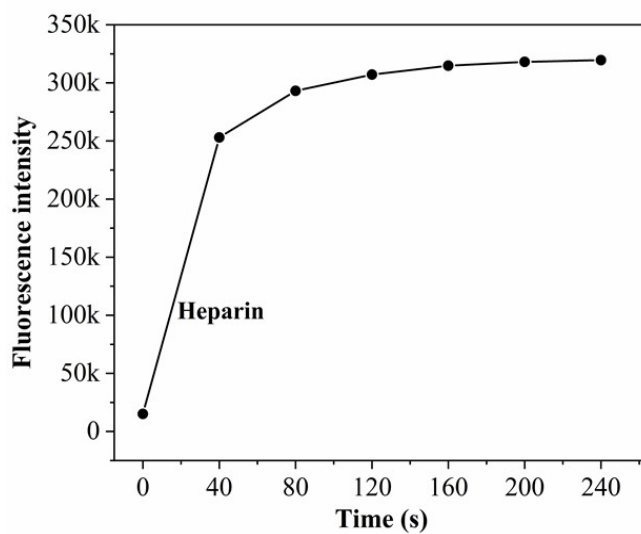

Figure S6. Time response of  $\text{TPA-P}^+$  ( $2.5 \mu\text{M}$ ) to heparin ( $2.0 \text{ nM}$ ) in the water (containing 1% DMSO).

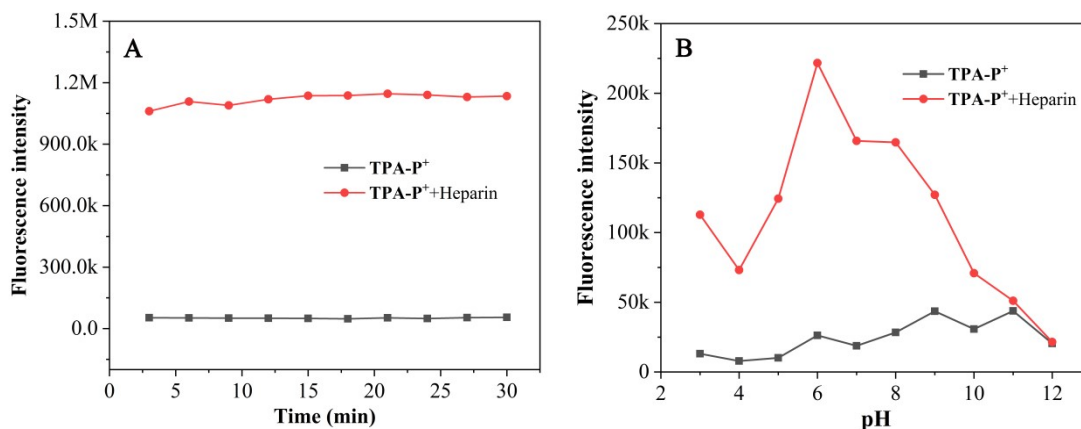

Figure S7. Effect of time (A) and pH (B) on free **TPA-P<sup>+</sup>** and **TPA-P<sup>+</sup>+heparin** complex in the water (containing 1% DMSO).  $\lambda_{\text{ex}} = 470 \text{ nm}$

### 5. The selectivity of **TPA-P<sup>+</sup>+heparin** complex to PRTM

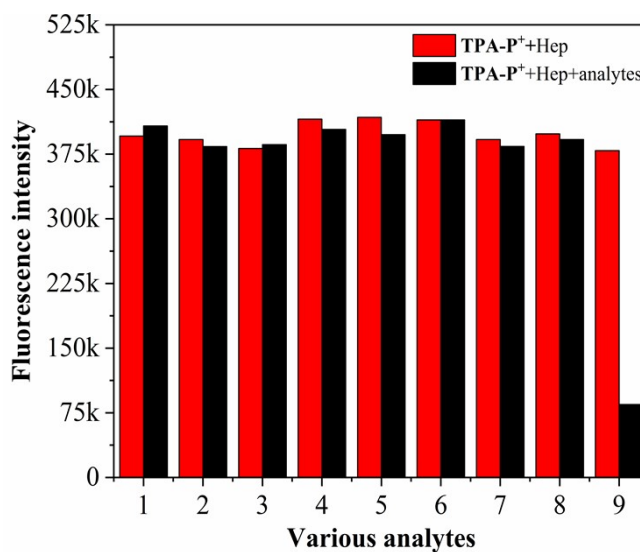

Figure S8. Selectivity of **TPA-P<sup>+</sup>+Heparin** complex for sensing of PRTM over other possible analytes including: 1 Valine (Val); 2 Histidine (His); 3 Glutathione (GSH); 4 Cystine (Cys); 5 Serine (Ser); 6 Tryptophen (Try); 7 NaCl; 8 KBr; 9 Protamine (PRTM).  $\lambda_{\text{ex}} = 470 \text{ nm}$

### 6. Reversibility of the “off-on-off” system constructed by **TPA-P<sup>+</sup>+heparin+PRTM**

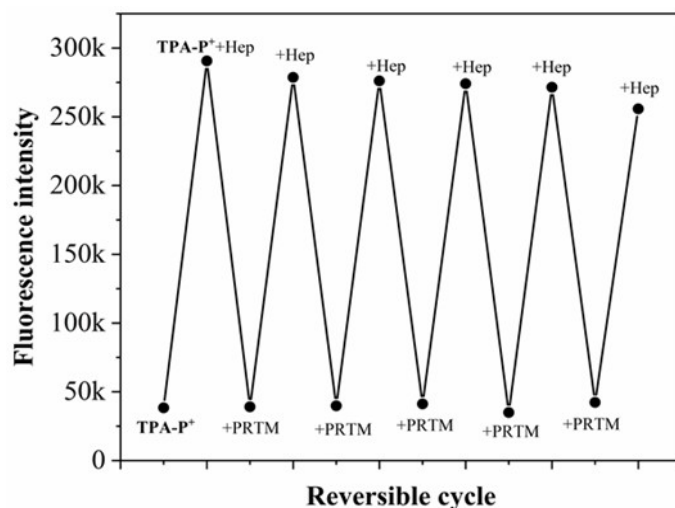

Figure S9. Reversibility of **TPA-P<sup>+</sup>** (5.0  $\mu\text{M}$ ) in subsequent response to heparin (10  $\mu\text{g}/\text{mL}$ ) and PRTM (15  $\mu\text{g}/\text{mL}$ ) in the water (containing 1% DMSO).  $\lambda_{\text{ex}} = 470 \text{ nm}$ .

### 7. Heparin sensing in serum containing 100 $\mu\text{M}$ NaCl

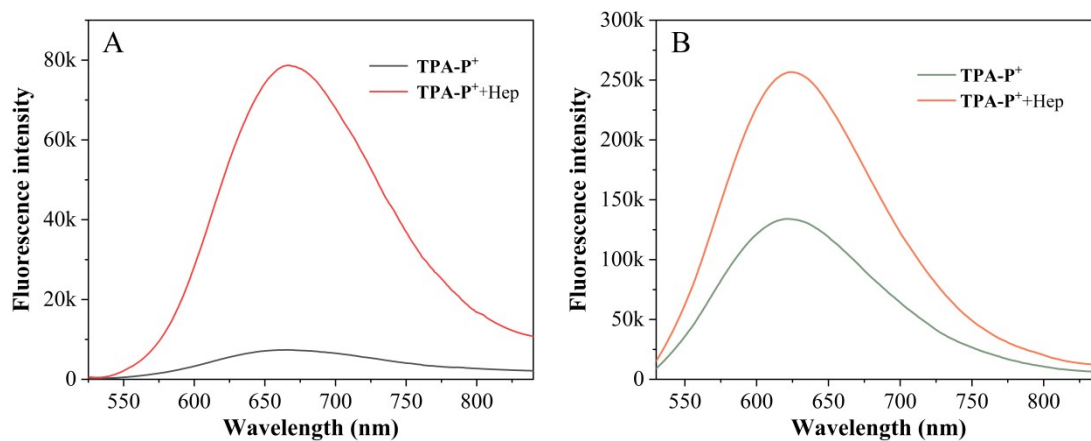

Figure S10. After adding 100  $\mu\text{M}$  NaCl, emission spectral changes of **TPA-P<sup>+</sup>** (2.5  $\mu\text{M}$ ) upon addition of heparin (16  $\mu\text{g}/\text{mL}$ ) in water (A) and human serum (B) (containing 1% DMSO)

### 8. HRMS and NMR characterizations



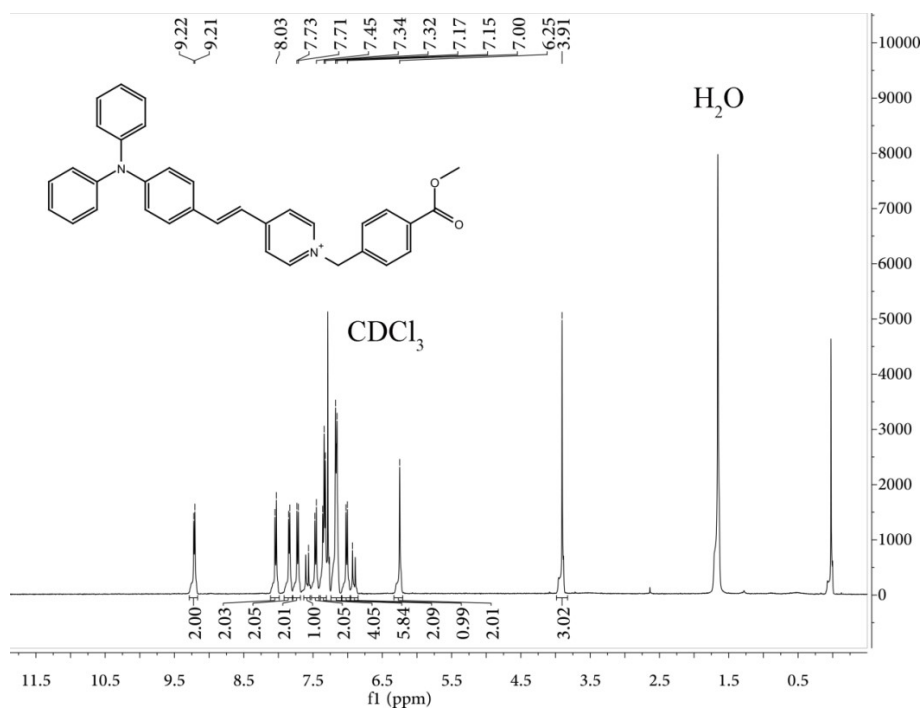

Figure S11. The <sup>1</sup>H NMR spectra of TPA-P<sup>+</sup> in CDCl<sub>3</sub>.

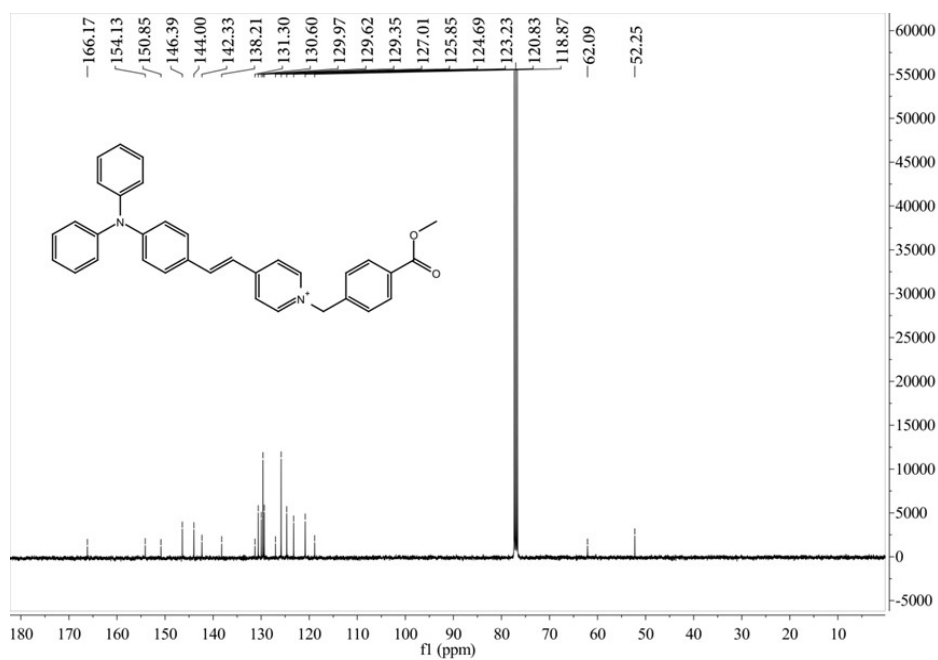

Figure S12. The <sup>13</sup>C NMR spectra of TPA-P<sup>+</sup> in CDCl<sub>3</sub>.

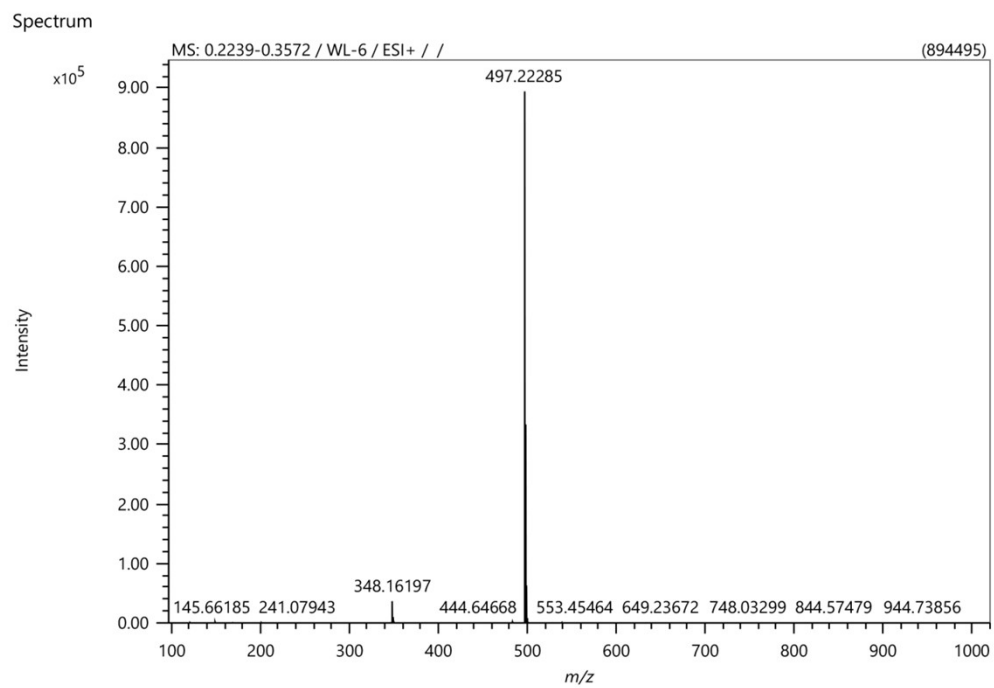

Figure S13. The HRMS spectra of **TPA-P<sup>+</sup>**.
